# Supplementary material for: Identification of α-Enolase as an Autoantigen in Lung Cancer: Its Overexpression Is Associated with Clinical Outcomes
Source: Oxford University Press journal article supplement (doi:10.1158/1078-0432.ccr-06-0324), 2006-10-01
Supplement: 10780432ccr060324-sup-supplementary_tables_1-2.pdf [file 10780432ccr060324-sup-supplementary_tables_1-2.pdf]

**Supplemental Table 1.** Number of patients analyzed in ENO1-staining IHC according to staining intensity and distribution

| <b>Intensity<br/>Distribution</b> | <b>0 (negative)</b> | <b>1 (weak)</b> | <b>2 (moderate)</b> | <b>3 (strong)</b> |
|-----------------------------------|---------------------|-----------------|---------------------|-------------------|
| <b>0 (0%)</b>                     | 0                   | 0               | 0                   | 0                 |
| <b>1 (1-25%)</b>                  | 0                   | 0               | 2                   | 2                 |
| <b>2 (26-50%)</b>                 | 0                   | 0               | 8                   | 16                |
| <b>3 (51-75%)</b>                 | 0                   | 5               | 14                  | 17                |
| <b>4 (76-100%)</b>                | 0                   | 5               | 4                   | 7                 |

**Supplemental Table 2** Correlation of expression status of ENO1 and patient-related clinical parameters using Quick score of 6 as a cut-off value.

|                       | Quick score < 6 | Quick score ≥ 6 | Univariate analysis<br><i>P</i> value |
|-----------------------|-----------------|-----------------|---------------------------------------|
| <b>Age</b>            |                 |                 |                                       |
| < 65                  | 22              | 7               | 0.149                                 |
| ≥ 65                  | 30              | 21              |                                       |
| <b>Gender</b>         |                 |                 |                                       |
| Male                  | 45              | 24              | 1.0                                   |
| Female                | 7               | 4               |                                       |
| <b>Smoking status</b> |                 |                 |                                       |
| No                    | 10              | 15              | 0.134                                 |
| Yes                   | 32              | 23              |                                       |
| <b>Histology type</b> |                 |                 |                                       |
| SCC                   | 27              | 13              | 0.815                                 |
| Non-SCC               | 25              | 15              |                                       |
| AdenoCa               | 21              | 10              | 0.811                                 |
| Non-AdenoCa           | 31              | 18              |                                       |
| <b>Stage</b>          |                 |                 |                                       |
| Stage I + II          | 33              | 18              | 1.0                                   |
| Stage III             | 19              | 10              |                                       |
| <b>Recurrence</b>     |                 |                 |                                       |
| No                    | 26              | 9               | 0.159                                 |
| Yes                   | 26              | 19              |                                       |
